# Supplementary material for: Monomeric Fe(iii) half-sandwich complexes [Cp′FeX2] – synthesis, properties and electronic structure
Source: Royal Society of Chemistry journal article supplement (doi:10.1039/c8dt01570h), 2018-01-01
Supplement: c8dt01570h1.pdf [file c8dt01570h1.pdf]

## Electronic Supplementary Information

# Monomeric Fe(III) Half-Sandwich Complexes [Cp'FeX<sub>2</sub>] – Synthesis, Properties and Electronic Structure

Matthias Reiners,<sup>a</sup> Miyuki Maekawa,<sup>a</sup> Dirk Baabe,<sup>a</sup> Marc-Kevin Zaretzke,<sup>a</sup> Peter Schweyen,<sup>a</sup> Constantin G. Daniliuc,<sup>a</sup> Matthias Freytag,<sup>a</sup> Jan Raeder,<sup>a</sup> Johannes Hohenberger,<sup>b</sup> Jörg Sutter,<sup>b</sup> Karsten Meyer,<sup>b</sup> and Marc D. Walter<sup>\*a</sup>

<sup>a</sup> *Institut für Anorganische und Analytische Chemie, Technische Universität Braunschweig, Hagenring 30, 38106 Braunschweig, Germany*

<sup>b</sup> *University of Erlangen–Nürnberg, Department of Chemistry & Pharmacy, Inorganic Chemistry, Egerlandstr. 1, 91058 Erlangen, Germany.*

### Table of content

|                                                                                                     |     |
|-----------------------------------------------------------------------------------------------------|-----|
| 1. Additional Experimental Details                                                                  | S2  |
| 2. Crystallographic Details for Complexes <b>2</b> , <b>3</b> , <b>4</b> , <b>7</b> and <b>8</b>    | S4  |
| 3. Variable Temperature (VT) <sup>1</sup> H NMR Studies                                             | S5  |
| 4. Solid-state Magnetic Susceptibility of Complexes <b>2</b> , <b>3</b> and <b>4</b>                | S6  |
| 5. Zero-field <sup>57</sup> Fe Mössbauer Spectroscopy on Complexes <b>2</b> , <b>6</b> and <b>7</b> | S7  |
| 6. Electrochemical Studies on Complexes <b>7</b> and <b>8</b>                                       | S10 |
| 7. Computational Details                                                                            | S11 |
| 8. References                                                                                       | S15 |

## 1. Additional Experimental Details

**[NEt<sub>4</sub>][Cp'FeI<sub>2</sub>].** A mixture of [Cp'FeI]<sub>2</sub> (0.21 g, 0.25 mmol) and NEt<sub>4</sub>I (0.13 g, 0.25 mmol) were suspended in CH<sub>2</sub>Cl<sub>2</sub> (ca. 15 mL). The suspension was stirred at room temperature for 2 h. During this time the reaction mixture turned yellow-orange and a green precipitate formed. The yellow-orange CH<sub>2</sub>Cl<sub>2</sub> solution was filtered and a layer of pentane (ca. 30 mL) was added. Yellow-orange needles were obtained by slow diffusion at room temperature over 24 h. Yield: 0.21 g (0.31 mmol, 74%). M.p. > 203 °C (dec.). <sup>1</sup>H NMR (CD<sub>2</sub>Cl<sub>2</sub>, 289 K): δ 21.0 (8H, NEt<sub>4</sub>-CH<sub>2</sub>, *v*<sub>1/2</sub> = 215 Hz), 11.7 (12H, NEt<sub>4</sub>-CH<sub>3</sub>, *v*<sub>1/2</sub> = 215 Hz), -23.0 (18H, Cp'-CMe<sub>3</sub>, *v*<sub>1/2</sub> = 220 Hz), -34.9 (9H, Cp'-CMe<sub>3</sub>, *v*<sub>1/2</sub> = 130 Hz). Anal. calcd. for C<sub>25</sub>H<sub>49</sub>Ni<sub>2</sub>Fe (673.33): C, 44.60; H, 7.34. Found: C, 44.45; H, 7.18.

**Reaction of 4 towards H<sub>2</sub> in cyclohexane.** Complex 4 (10 mg, 0.02 mmol) was dissolved in cyclohexane-d<sub>12</sub> (0.7 mL), pressurized with H<sub>2</sub> (8 bar) in an autoclave and stirred at ambient temperatures for 4 h. After releasing the pressure, an <sup>1</sup>H NMR spectrum was recorded establishing the formation of complexes 5 and 6 in an approximate ratio of 1:4 besides Me<sub>4</sub>Si. For further analytic data of complex 5 and 6 see Ref. [1].

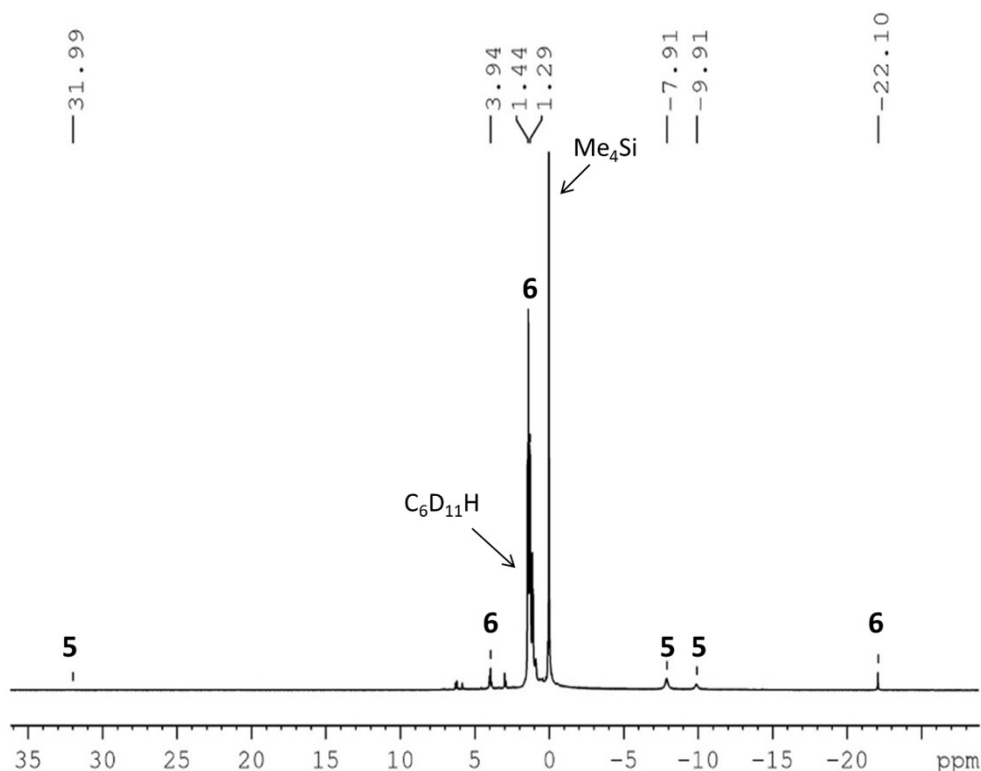

**Figure S1.** Crude reaction mixture obtained from the hydrogenation of complex 4 in cyclohexane-d<sub>12</sub>.

**[Cp'Fe(μ-H)<sub>2</sub>]<sub>2</sub> (6).** To a frozen suspension (cooled with liquid N<sub>2</sub>) of KC<sub>8</sub> (0.135 g, 1.00 mmol, 2 eq.) and THF (10 mL) in a “bomb” flask (heavy walled flask equipped with a Teflon plug valve) a solution of [Cp'Fe(μ-I)]<sub>2</sub> (1) (0.416 g, 0.50 mmol, 1 eq.) in THF (10 mL) was added and closed. The frozen flask was taken out of the liquid nitrogen bath and let reach ambient temperature under steering. During

warming to ambient temperature, the suspension turned from light brown over green to a dark brown-violet. After stirring for 2 h the overpressure was carefully released and the solvent in oil pump vacuum removed. The violet brown residue was extracted with hexane (4 x 5 mL) and filtered. After removing the solvent in oil pump vacuum the dark residue was dissolved in a minimum amount of Et<sub>2</sub>O (ca. 1 mL) and stored for crystallization at -30°C to give dark violet blocks. Yield: 0.130 g (0.22 mmol, 45%). For further analytical data see Ref. [1].

**Reduction of 8 with KC<sub>8</sub>.** A suspension of KC<sub>8</sub> (6.7 mg, 1.00 eq.) in THF (ca. 5 mL) was added to a stirred solution of **8** (30 mg, 0.05 mmol, 1.00 eq.) in THF (ca. 5 mL) at ambient temperatures and reaction mixture was stirred for an additional 0.5 h. The colour changed immediately from yellow to green. During solvent evaporation under dynamic oil pump vacuum the colour changed to orange. The orange residue was extracted with pentane and dried. The residue was dissolved in a minimum amount of Et<sub>2</sub>O and stored at -30°C to yield red blocks of **6** (identification by <sup>1</sup>H NMR spectroscopy and X-ray diffraction analysis). For the UV/vis experiment 7.1mg of **8** was dissolved in THF (50 mL) and filtered over a pad of KC<sub>8</sub>. The yellow solution turned immediately green and was directly transferred into a UV/vis cell and measured. The half-life time of **A** at ambient temperature was determined to be ca. 40 min.

## 2. Crystallographic Details for Complexes 2, 3, 4, 7, and 8

**Table S1.** Crystallographic data.

| Compound                                                                               | 2                                                              | 3                                                | 4                                                 | 7                                               | 8                                                  |
|----------------------------------------------------------------------------------------|----------------------------------------------------------------|--------------------------------------------------|---------------------------------------------------|-------------------------------------------------|----------------------------------------------------|
| Chemical formula                                                                       | C <sub>41</sub> H <sub>66</sub> Fe <sub>2</sub> I <sub>2</sub> | C <sub>17</sub> H <sub>29</sub> FeI <sub>2</sub> | C <sub>25</sub> H <sub>51</sub> FeSi <sub>2</sub> | C <sub>46</sub> H <sub>70</sub> Fe <sub>2</sub> | C <sub>23</sub> H <sub>35</sub> FeSbF <sub>6</sub> |
| Formula Mass                                                                           | 924.44                                                         | 543.05                                           | 463.69                                            | 734.72                                          | 603.13                                             |
| Crystal system                                                                         | Monoclinic                                                     | Orthorhombic                                     | Orthorhombic                                      | Monoclinic                                      | Monoclinic                                         |
| <i>a</i> /Å                                                                            | 15.2121(2)                                                     | 12.4512(2)                                       | 17.5073(6)                                        | 9.64934(15)                                     | 10.6190(2)                                         |
| <i>b</i> /Å                                                                            | 14.6908(2)                                                     | 17.0538(2)                                       | 16.8530(6)                                        | 15.7931(2)                                      | 12.4220(3)                                         |
| <i>c</i> /Å                                                                            | 19.0206(4)                                                     | 18.7165(2)                                       | 19.1250(6)                                        | 12.94716(16)                                    | 18.3035(4)                                         |
| $\alpha$ /°                                                                            | 90                                                             | 90                                               | 90                                                | 90                                              | 90                                                 |
| $\beta$ /°                                                                             | 105.618(2)                                                     | 90                                               | 90                                                | 92.1917(12)                                     | 92.067(2)                                          |
| $\gamma$ /°                                                                            | 90                                                             | 90                                               | 90                                                | 90                                              | 90                                                 |
| Unit cell volume/Å <sup>3</sup>                                                        | 4093.74(12)                                                    | 3974.27(9)                                       | 5642.8(3)                                         | 1971.61(5)                                      | 2412.83                                            |
| Temperature/K                                                                          | 100(2)                                                         | 100(2)                                           | 100(2)                                            | 100(2)                                          | 100(2)                                             |
| Space group                                                                            | <i>P</i> 2 <sub>1</sub> /n                                     | <i>P</i> b c a                                   | <i>P</i> b c a                                    | <i>P</i> 2 <sub>1</sub> /c                      | <i>P</i> 2 <sub>1</sub> /c                         |
| No. of formula units per unit cell, <i>Z</i>                                           | 4                                                              | 8                                                | 8                                                 | 2                                               | 4                                                  |
| Radiation type                                                                         | Mo K $\alpha$                                                  | Mo K $\alpha$                                    | Mo K $\alpha$                                     | Cu K $\alpha$                                   | Cu K $\alpha$                                      |
| Absorption coefficient, $\mu$ /mm <sup>-1</sup>                                        | 2.243                                                          | 3.858                                            | 0.628                                             | 6.105                                           | 14.187                                             |
| No. of reflections measured                                                            | 101894                                                         | 137349                                           | 145214                                            | 32840                                           | 8118                                               |
| No. of independent reflections                                                         | 10542                                                          | 5279                                             | 5758                                              | 4076                                            | 6935                                               |
| <i>R</i> <sub>int</sub>                                                                | 0.0398                                                         | 0.0392                                           | 0.1405                                            | 0.0406                                          | -                                                  |
| Final <i>R</i> <sub>1</sub> values ( <i>I</i> > 2 $\sigma$ ( <i>I</i> ))               | 0.0240                                                         | 0.0160                                           | 0.0502                                            | 0.0290                                          | 0.0497                                             |
| Final <i>wR</i> ( <i>F</i> <sup>2</sup> ) values ( <i>I</i> > 2 $\sigma$ ( <i>I</i> )) | 0.0467                                                         | 0.0319                                           | 0.0866                                            | 0.0736                                          | 0.0568                                             |
| Final <i>R</i> <sub>1</sub> values (all data)                                          | 0.0330                                                         | 0.0257                                           | 0.0955                                            | 0.0298                                          | 0.1316                                             |
| Final <i>wR</i> ( <i>F</i> <sup>2</sup> ) values (all data)                            | 0.0499                                                         | 0.0326                                           | 0.0977                                            | 0.0741                                          | 0.1353                                             |
| Goodness of fit on <i>F</i> <sup>2</sup>                                               | 1.074                                                          | 0.927                                            | 1.017                                             | 1.044                                           | 1.039                                              |
| Flack parameter                                                                        | -                                                              | -                                                | -                                                 | -                                               | -                                                  |
| Largest diff. peak and hole/e Å <sup>3</sup>                                           | 0.635 / -0.699                                                 | 0.837 / -0.868                                   | 0.481 / -0.295                                    | 0.230 / -0.405                                  | 1.070 / -2.423                                     |

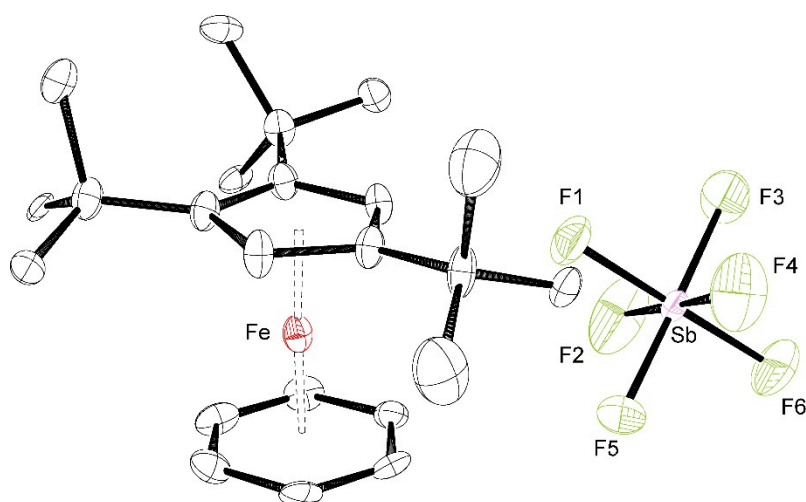

**Figure S2.** Thermal ellipsoid plot (50% probability) of the molecular structures of complex 8. H-atoms are omitted for clarity. Disordered positions of the benzene ring and of two *t*Bu-groups are not shown.

### 3. Variable Temperature (VT) $^1\text{H}$ NMR Studies

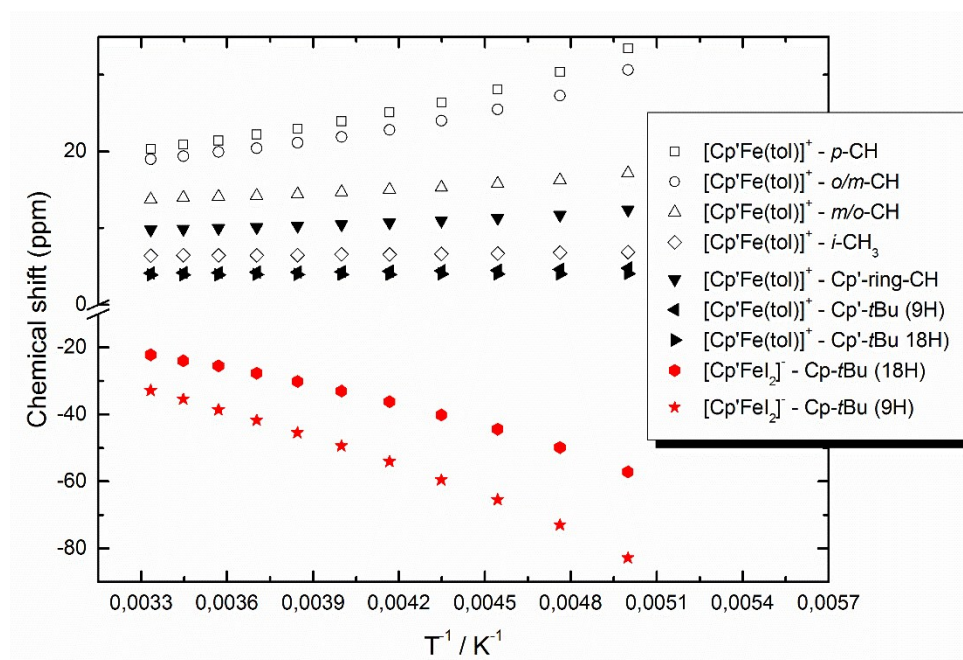

**Figure S3.** Chemical shift ( $\delta$ ) vs.  $T^{-1}$  plot for the  $^1\text{H}$  NMR resonances of  $[\text{Cp}'\text{Fe}(\text{tol})][\text{Cp}'\text{FeI}_2]$  (2) in  $\text{CD}_2\text{Cl}_2$  between  $T = 188$  and  $300$  K.

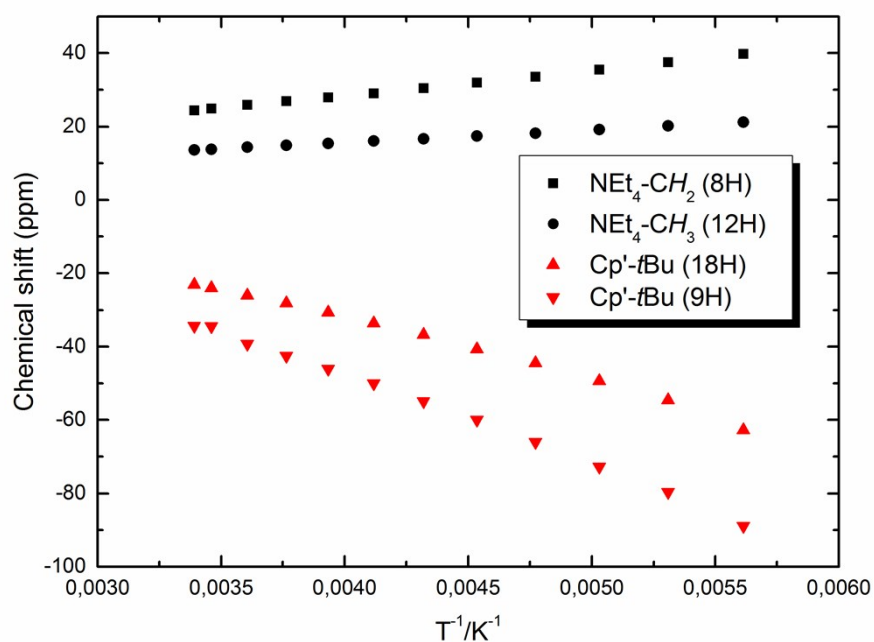

**Figure S4.** Chemical shift ( $\delta$ ) vs.  $T^{-1}$  plot for the  $^1\text{H}$  NMR resonances of  $[\text{NEt}_4][\text{Cp}'\text{FeI}_2]$  in  $\text{CD}_2\text{Cl}_2$  between  $T = 175$  and  $300$  K.

#### 4. Solid-state Magnetic Susceptibility of Complexes 2–4

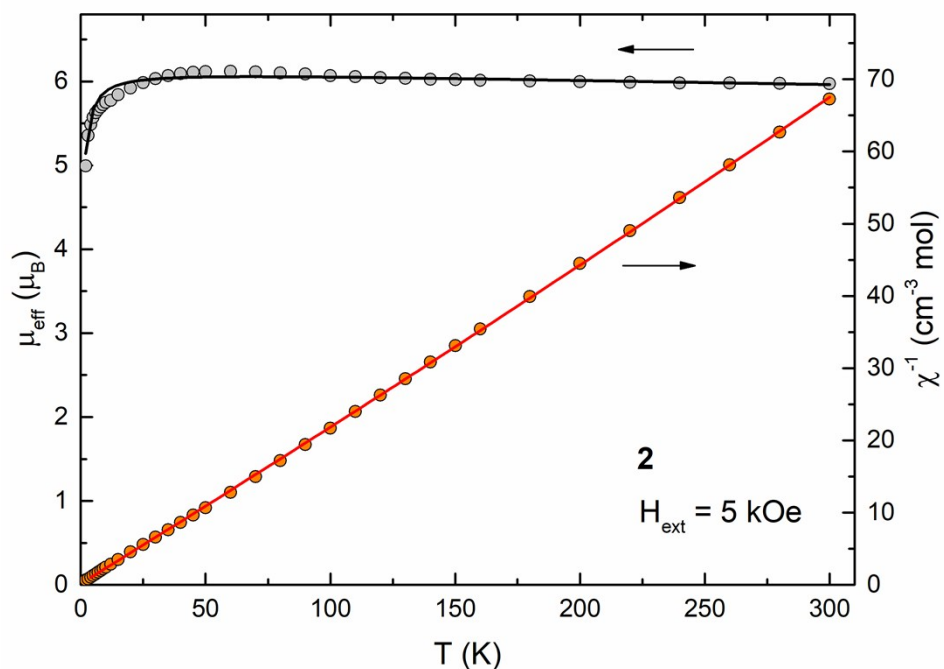

**Figure S5.** Effective magnetic moment ( $\mu_{\text{eff}}$ ) vs.  $T$  plot for compound **2**, recorded at temperatures between  $T = 2.6$  and 300 K with an applied magnetic field of  $H_{\text{ext}} = 5$  kOe. Symbols: experimental data. Lines: adaptation of a modified Curie-Weiss law (see Table S2).

**Table S2.** Parameters determined for complexes **2–4** using a modified Curie-Weiss model, which considers a phenomenological temperature-independent contribution ( $\chi_{\text{TIP}}$ ) to the magnetic susceptibility.

| Complex  | $C$ ( $\text{cm}^3 \text{ K mol}^{-1}$ ) | $\theta$ (K) | $\chi_{\text{TIP}}$ ( $10^{-4} \text{ cm}^3 \text{ mol}^{-1}$ ) | $\mu_{\text{eff}}$ ( $\mu_{\text{B}}$ ) | Fit                |
|----------|------------------------------------------|--------------|-----------------------------------------------------------------|-----------------------------------------|--------------------|
| <b>2</b> | 4.697(21)                                | -0.8(2)      | -8.0(8)                                                         | 6.13                                    |                    |
| <b>3</b> | 2.615(5)                                 | -3.8(2)      | -5.2(1)                                                         | 4.57                                    | $T > 50 \text{ K}$ |
| <b>4</b> | 2.717(6)                                 | 3.7(2)       | -6.0(4)                                                         | 4.66                                    | $T > 50 \text{ K}$ |

## 5. Zero-field $^{57}\text{Fe}$ Mössbauer Spectroscopy on Complexes 2, 6 and 7

**Table S3.** Mössbauer parameters for complex **2**. All spectra were analysed by a least-squares fitting routine based on the stochastic relaxation model developed by Blume and Tjon.<sup>[2]</sup> The isomer shifts ( $\delta_{\text{iso}}$ ) were specified relative to metallic iron at room temperature but were not corrected in terms of the second order Doppler shift. The quadrupole splitting is given by  $\Delta E_Q = 2 \varepsilon$  with  $\varepsilon = e^2 q Q/4$  and  $\eta = 0$  (constants  $e$ ,  $q$ ,  $Q$ ,  $\eta$  were used in their usual meaning).  $v_c$  and  $V$  describes the relaxation rate and the population ratio of the two Fe(II) sites, respectively. While the intensity ratio of the second and the third Mössbauer transition ( $A_2/A_3 = 2$ ) was fixed, we phenomenologically used the intensity ratio of the first and the third Mössbauer transition ( $A_1/A_3$ ) as a free parameter in the fit, that might be explained by texture effects and/or by crystal packing effects (as also observed for complex **7**, *vide infra*).

| T<br>(K) | $\delta_{\text{iso}}$<br>(mm s <sup>-1</sup> ) | $\Delta E_Q$<br>(mm s <sup>-1</sup> ) | $\Gamma_{\text{HWHM}}$<br>(mm s <sup>-1</sup> ) | $B_{\text{hf}}$<br>(T) | $v_c$<br>(mm s <sup>-1</sup> ) | $A_1/A_3$<br>(1) | $A_2/A_3$<br>(1) | V<br>(%) |   |
|----------|------------------------------------------------|---------------------------------------|-------------------------------------------------|------------------------|--------------------------------|------------------|------------------|----------|---|
| 150      | 0.545(5)                                       | -1.672(10)                            | 0.140(8)                                        | 0*                     | -                              | 2.2(1)           | 2*               | 51.0     | a |
|          | 0.976(9)                                       | 1.618(16)                             | 0.130(18)                                       | 37.4*                  | 182(58)                        | 4.0(4)           | 2*               | 49.0     |   |
| 77       | 0.561(4)                                       | -1.672(8)                             | 0.141(8)                                        | 0*                     | -                              | 2.2(1)           | 2*               | 51.2     | a |
|          | 1.041(36)                                      | 1.688(66)                             | 0.137(25)                                       | 37.4*                  | 42.8(8.2)                      | 3.9(6)           | 2*               | 48.8     |   |
| 77       | 0.551(5)                                       | -1.684(10)                            | 0.138(10)                                       | 0*                     | -                              | 2.3(2)           | 2*               | 47.7     | b |
|          | 0.992(53)                                      | 1.638(92)                             | 0.144(36)                                       | 37.4*                  | 36.1(7.5)                      | 4.4(9)           | 2*               | 52.3     |   |
| 15       | 0.558(3)                                       | -1.674(6)                             | 0.157(5)                                        | 0*                     | -                              | 2.3(1)           | 2*               | 55.4     | b |
|          | 1.022(22)                                      | 1.474(42)                             | 0.100(16)                                       | 37.4*                  | 0.21(16)                       | 4.8(5)           | 2*               | 44.6     |   |
| 12       | 0.557(4)                                       | -1.682(8)                             | 0.161(6)                                        | 0*                     | -                              | 2.3(1)           | 2*               | 54.7     | b |
|          | 1.024(27)                                      | 1.456(52)                             | 0.100(18)                                       | 37.4(2)                | 0.23(18)                       | 4.9(6)           | 2*               | 45.3     |   |

[a] Measured with  $v_{\text{max}} = 7.247 \text{ mm s}^{-1}$ . [b] Measured with  $v_{\text{max}} = 10.400 \text{ mm s}^{-1}$ . (\*) Fixed in the simulation.

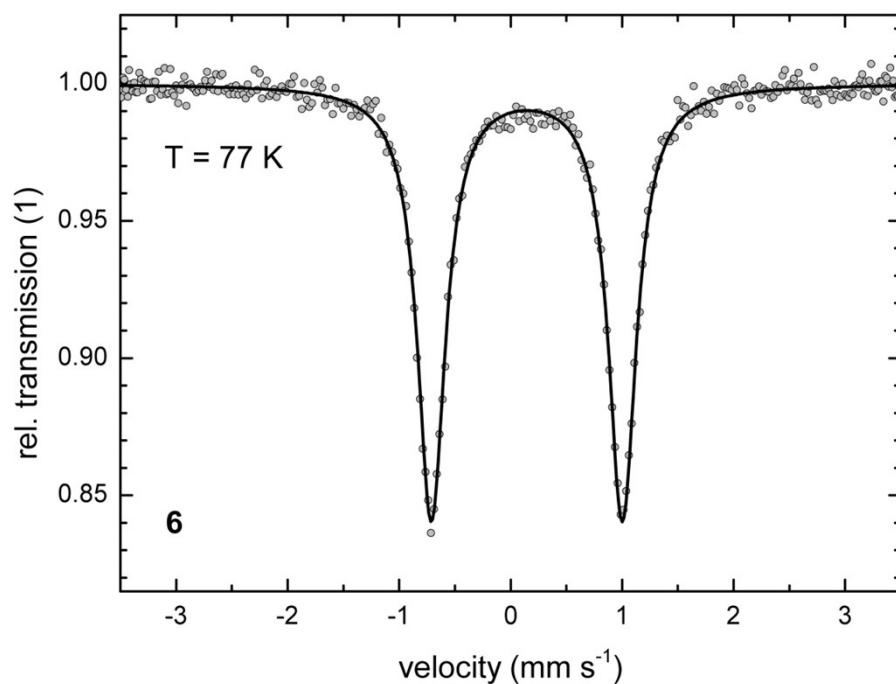

**Figure S6.** Zero-field  $^{57}\text{Fe}$  Mössbauer spectrum for  $[\text{Cp}'\text{Fe}(\mu\text{-H})_2]_2$  (**6**), recorded at  $T = 77$  K.

**Table S4.** Mössbauer parameters for complex **6**. The isomer shifts ( $\delta_{\text{iso}}$ ) were specified relative to metallic iron at room temperature but were not corrected in terms of the second order Doppler shift.  $A_-/A_+$  describes the intensity ratio of the spectral areas of the low velocity (energy) Mössbauer transition to the high velocity (energy) Mössbauer transition.

| T<br>(K) | $\delta_{\text{iso}}$<br>(mm s $^{-1}$ ) | $\Delta E_{\text{Q}}$<br>(mm s $^{-1}$ ) | $\Gamma_{\text{HWHM}}$<br>(mm s $^{-1}$ ) | $A_-/A_+$<br>(1) |
|----------|------------------------------------------|------------------------------------------|-------------------------------------------|------------------|
| 150      | 0.241(2)                                 | 1.712(3)                                 | 0.145(2)                                  | 1                |
| 77       | 0.266(2)                                 | 1.713(3)                                 | 0.153(3)                                  | 1                |
| 20       | 0.272(1)                                 | 1.713(3)                                 | 0.156(2)                                  | 1                |



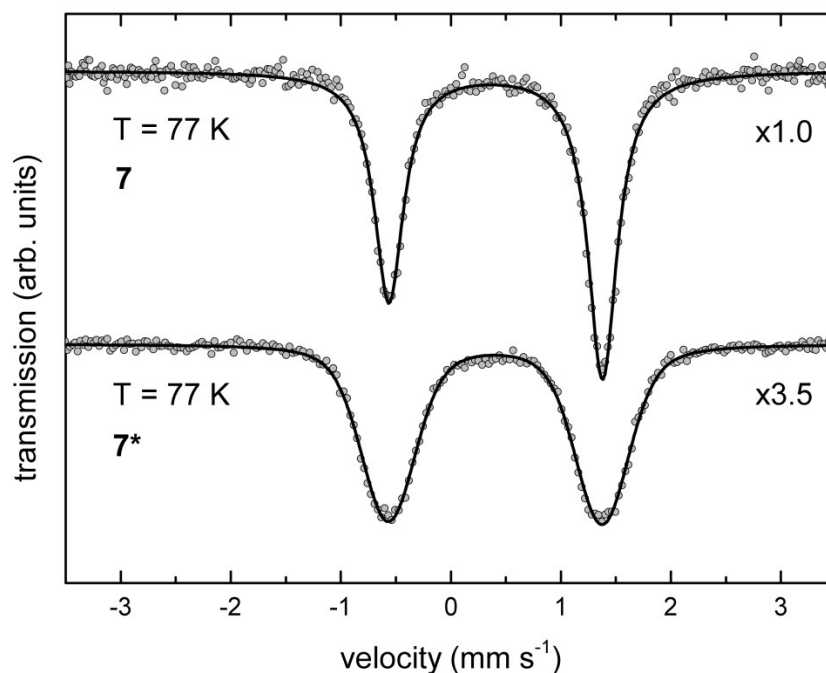

**Figure S7.** Zero-field  $^{57}\text{Fe}$  Mössbauer spectra for  $[(\text{Cp}'\text{Fe})_2(\mu_2\text{-}\eta^5\text{:}\eta^5\text{-C}_{12}\text{H}_{12})]$ , recorded at  $T = 77\text{ K}$  on a powdered sample (**7**) or on a frozen THF solution (**7\***). This measurement proves that the significantly different peak intensities observed for the doublet in the Mössbauer spectrum of complex **7** are explained by texture effects or by crystal packing effects in this material.

**Table S5.** Mössbauer parameters for complex **7** and **7\***. The isomer shifts ( $\delta_{\text{iso}}$ ) were specified relative to metallic iron at room temperature but were not corrected in terms of the second order Doppler shift.  $A/A_+$  describes the intensity ratio of the spectral areas of the low velocity (energy) Mössbauer transition to the high velocity (energy) Mössbauer transition.

| T<br>(K)        | $\delta_{\text{iso}}$<br>(mm s $^{-1}$ ) | $\Delta E_{\text{Q}}$<br>(mm s $^{-1}$ ) | $\Gamma_{\text{HWHM}}$<br>(mm s $^{-1}$ ) | $A/A_+$<br>(1) |
|-----------------|------------------------------------------|------------------------------------------|-------------------------------------------|----------------|
| 150             | 0.510(2)                                 | 1.935(4)                                 | 0.145(3)                                  | 0.72(1)        |
| 77              | 0.529(2)                                 | 1.941(5)                                 | 0.160(3)                                  | 0.75(2)        |
| 77 <sup>a</sup> | 0.524(3)                                 | 1.943(5)                                 | 0.113(11)                                 | 0.99(1)        |
| 20              | 0.537(2)                                 | 1.943(4)                                 | 0.154(3)                                  | 0.77(1)        |

<sup>a</sup> Recorded in frozen THF solution; the analysis was performed with a doublet of Voigt lines with Gaussian line width  $\sigma = 0.194(8)\text{ mm s}^{-1}$ .

## 6. Electrochemical Studies on Complexes 7 and 8

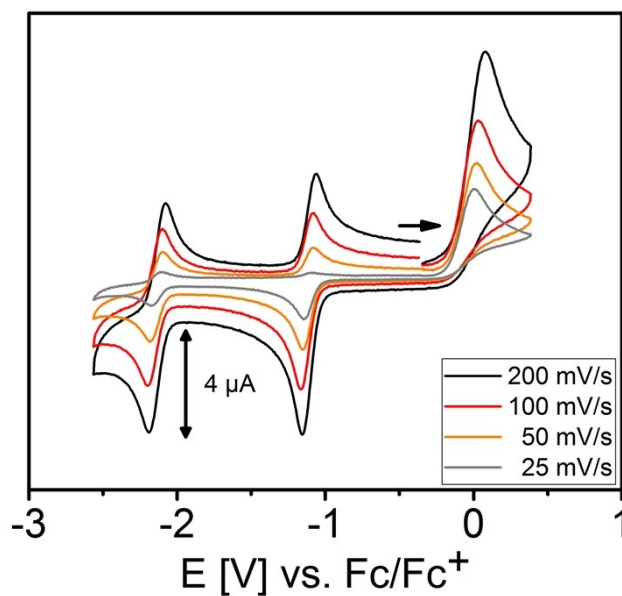

**Figure S8.** Electrochemical studies performed on complex **7**, recorded at ambient temperatures in THF with 0.1 M  $[n\text{-Bu}_4\text{N}][\text{PF}_6]$  supporting electrolyte and various scan rates from 25 up to 200  $\text{mV s}^{-1}$ :  $E_{\text{ox}} = 0.032 \text{ V}$ ;  $E_{1/2, \text{red}(1)} = -1.121 \text{ V}$ ;  $E_{1/2, \text{red}(2)} = -2.145 \text{ V}$ .

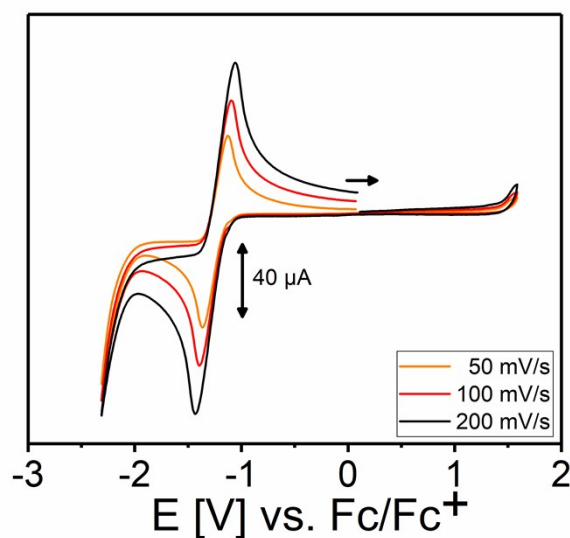

**Figure S9.** Electrochemical studies performed on complex **8**, recorded at ambient temperatures in THF with 0.1 M  $[n\text{-Bu}_4\text{N}][\text{PF}_6]$  supporting electrolyte, various scan rates from 50 up to 200  $\text{mV s}^{-1}$  and  $E_{1/2, \text{red}} = -1.252 \text{ V}$ .

## 7. Computational Details

All computations were performed using the DFT functional method B3LYP as implemented in the Gaussian09 program.<sup>[3]</sup> The all-electron triple- $\zeta$  basis set (6-311G<sup>\*\*</sup>)<sup>[4]</sup> was applied for all elements (Fe, Si, C and H), whereas a Stuttgart-Dresden pseudopotential (SDD)<sup>[5]</sup> was used for iodine (I).

**Table S6.** Energies of the optimized structures<sup>a</sup>

| Compound                                                                       | E(0 K) <sup>b</sup><br>[Ha] | H(298 K) <sup>c</sup><br>[Ha] | G(298 K) <sup>c</sup><br>[Ha] |
|--------------------------------------------------------------------------------|-----------------------------|-------------------------------|-------------------------------|
| <b>B3LYP:</b>                                                                  |                             |                               |                               |
| [Cp'FeI <sub>2</sub> ] <sup>-</sup> (S=0)                                      | -1951.711859 (28.1)         | -1951.685305 (27.5)           | -1951.767233 (31.3)           |
| [Cp'FeI <sub>2</sub> ] <sup>-</sup> (S=1)                                      | -1951.732095 (15.4)         | -1951.704816 (15.2)           | -1951.790737 (16.5)           |
| <b>[Cp'FeI<sub>2</sub>]<sup>-</sup> (S=2)</b>                                  | <b>-1951.756644 (0.0)</b>   | <b>-1951.729062 (0.0)</b>     | <b>-1951.817027 (0.0)</b>     |
| [Cp'FeI <sub>2</sub> ] <sup>-</sup> (S=1/2)                                    | -1951.622650 (8.9)          | -1951.595876 (8.8)            | -1951.678713 (10.1)           |
| <b>[Cp'FeI<sub>2</sub>]<sup>-</sup> (S=3/2)</b>                                | <b>-1951.636887 (0.0)</b>   | <b>-1951.609896 (0.0)</b>     | <b>-1951.694737 (0.0)</b>     |
| [Cp'FeI <sub>2</sub> ] <sup>-</sup> (S=5/2)                                    | -1951.625422 (7.2)          | -1951.597902 (7.5)            | -1951.684667 (6.6)            |
| <b>[Cp'Fe(CH<sub>2</sub>SiMe<sub>3</sub>)<sub>2</sub>] (S=3/2)<sup>d</sup></b> | <b>-2825.754990 (0.0)</b>   | <b>-2825.712376 (0.0)</b>     | <b>-2825.828588 (0.0)</b>     |
| [Cp'Fe(CH <sub>2</sub> SiMe <sub>3</sub> ) <sub>2</sub> ] (S=5/2) <sup>d</sup> | -2825.722688 (20.3)         | -2825.679358 (20.7)           | -2825.797311 (19.6)           |

<sup>a</sup> Values (in kcal/mol) given in parenthesis refer to the energy difference to the lowest computed spin-configuration for the individual compounds. <sup>b</sup> DFT energy incl. ZPE. <sup>c</sup> Standard conditions  $T = 298.15$  K and  $p = 1$  atm. <sup>d</sup>For [Cp'Fe(CH<sub>2</sub>SiMe<sub>3</sub>)<sub>2</sub>] (S=1/2) no SCF convergence was achieved.

**Table S7.** Comparison between computed and experimental structural parameters.

| Complex                                                           | Cp' <sub>cent</sub> -Fe<br>(Å) | Fe-X<br>(Å)            | X-Fe-X<br>(deg) |
|-------------------------------------------------------------------|--------------------------------|------------------------|-----------------|
| [Cp'FeI <sub>2</sub> ] <sup>-</sup> (S=0)                         | 1.628                          | 2.701<br>2.735         | 95.34           |
| [Cp'FeI <sub>2</sub> ] <sup>-</sup> (S=1)                         | 1.825                          | 2.701<br>2.709         | 98.22           |
| [Cp'FeI <sub>2</sub> ] <sup>-</sup> (S=2)                         | 2.011                          | 2.720<br>2.765         | 106.70          |
| [Cp'FeI <sub>2</sub> ] <sup>-</sup> (exp)                         | 1.99                           | 2.6168(3)<br>2.7027(3) | 102.104(10)     |
| [Cp'FeI <sub>2</sub> ] (S=1/2)                                    | 1.717                          | 2.564<br>2.600         | 99.11           |
| [Cp'FeI <sub>2</sub> ] (S=3/2)                                    | 1.874                          | 2.574<br>2.591         | 104.90          |
| [Cp'FeI <sub>2</sub> ] (S=5/2)                                    | 1.993                          | 2.603<br>2.630         | 108.40          |
| [Cp'FeI <sub>2</sub> ] (exp)                                      | 1.86                           | 2.5154(2)<br>2.5238(2) | 103.725(9)      |
| [Cp'Fe(CH <sub>2</sub> SiMe <sub>3</sub> ) <sub>2</sub> ] (S=3/2) | 1.971                          | 2.011<br>2.015         | 98.05           |
| [Cp'Fe(CH <sub>2</sub> SiMe <sub>3</sub> ) <sub>2</sub> ] (S=5/2) | 2.162                          | 2.048<br>2.069         | 113.01          |
| [Cp'Fe(CH <sub>2</sub> SiMe <sub>3</sub> ) <sub>2</sub> ] (exp)   | 1.91                           | 1.998(2)<br>2.0016(19) | 98.57(9)        |

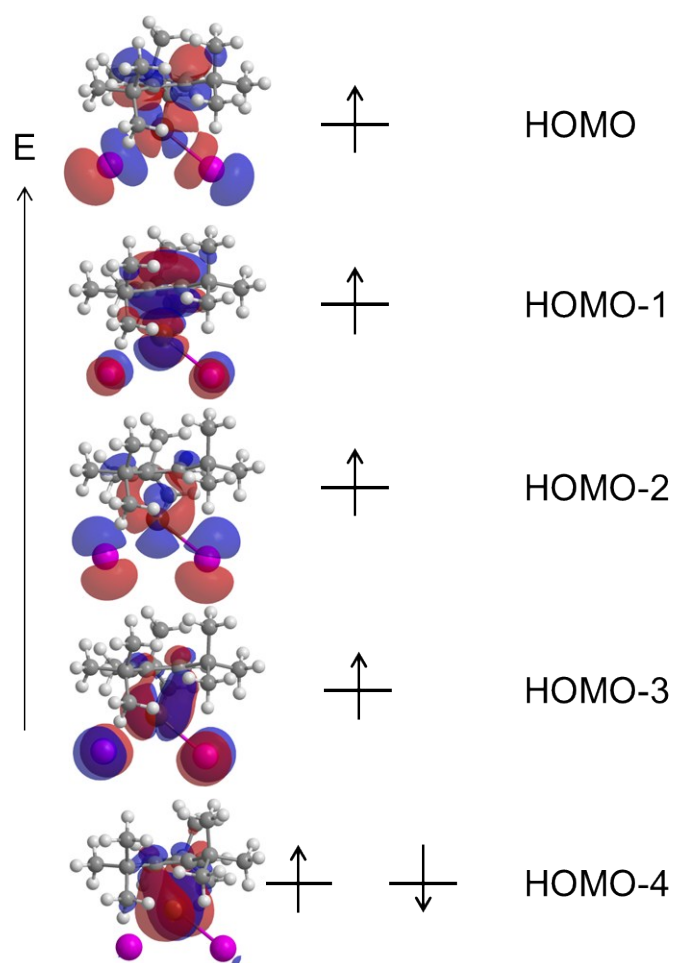

**Figure S10.** (Biorthogonalized) Kohn-Sham molecular orbitals for  $[\text{Cp}'\text{FeI}_2]^-$  anion from complex (**2**).

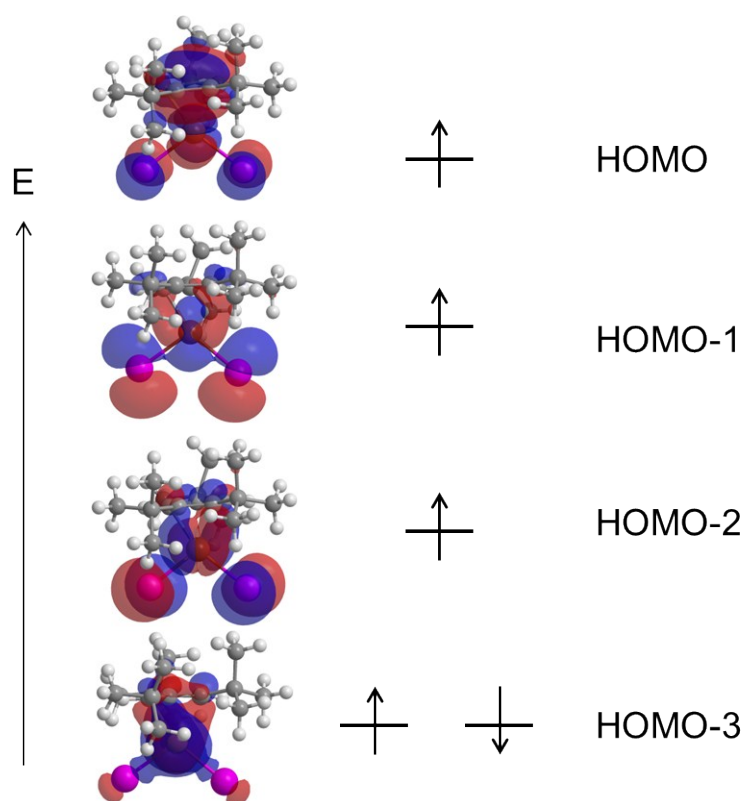

**Figure S11.** (Biorthogonalized) Kohn-Sham molecular orbitals for [Cp'FeI<sub>2</sub>] (3).

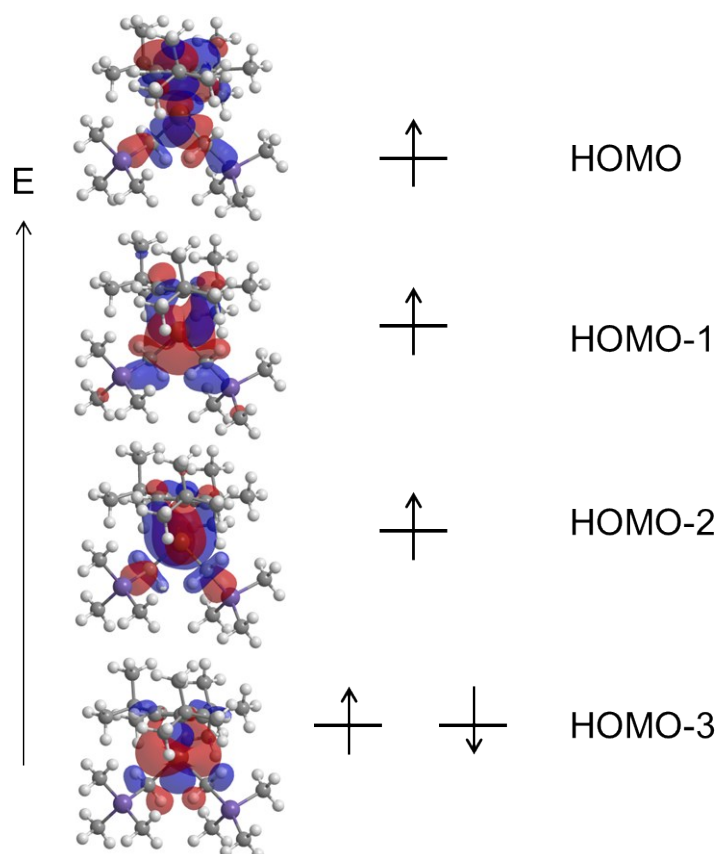

**Figure S12.** (Biorthogonalized) Kohn-Sham molecular orbitals for [Cp'Fe(CH<sub>2</sub>SiMe<sub>3</sub>)<sub>2</sub>] (4).

## 8. References

- [1] M. D. Walter, J. Grunenberg and P. S. White, *Chem. Sci.* 2011, **2**, 2120-2130.
- [2] M. Blume and J. A. Tjon, *Phys. Rev.*, 1968, **165**, 446-456.
- [3] Gaussian 09, Revision A.1, M. J. Frisch, G. W. Trucks, H. B. Schlegel, G. E. Scuseria, M. A. Robb, J. R. Cheeseman, G. Scalmani, V. Barone, B. Mennucci, G. A. Petersson, H. Nakatsuji, M. Caricato, X. Li, H. P. Hratchian, A. F. Izmaylov, J. Bloino, G. Zheng, J. L. Sonnenberg, M. Hada, M. Ehara, K. Toyota, R. Fukuda, J. Hasegawa, M. Ishida, T. Nakajima, Y. Honda, O. Kitao, H. Nakai, T. Vreven, J. A. Montgomery, Jr., J. E. Peralta, F. Ogliaro, M. Bearpark, J. J. Heyd, E. Brothers, K. N. Kudin, V. N. Staroverov, R. Kobayashi, J. Normand, K. Raghavachari, A. Rendell, J. C. Burant, S. S. Iyengar, J. Tomasi, M. Cossi, N. Rega, J. M. Millam, M. Klene, J. E. Knox, J. B. Cross, V. Bakken, C. Adamo, J. Jaramillo, R. Gomperts, R. E. Stratmann, O. Yazyev, A. J. Austin, R. Cammi, C. Pomelli, J. W. Ochterski, R. L. Martin, K. Morokuma, V. G. Zakrzewski, G. A. Voth, P. Salvador, J. J. Dannenberg, S. Dapprich, A. D. Daniels, Ö. Farkas, J. B. Foresman, J. V. Ortiz, J. Cioslowski, and D. J. Fox, Gaussian, Inc., Wallingford CT, 2009.
- [4] X. Cao and M. Dolg, *J. Chem. Phys.* 2001, **115**, 7348.
- [5] A. Bergner, M. Dolg, W. Küchle, H. Stoll and H. Preuss, *Mol. Phys.* 1993, **80**, 1431-41.
